# Supplementary material for: Assessing Performance of Contemporary Plant-Based Diets against the UK Dietary Guidelines: Findings from the Feeding the Future (FEED) Study
Source: MDPI journal article supplement (doi:10.3390/nu16091336), 2024-04-29
Supplement: s1 [file s1]

**Table S1.** Food items within each major food group.

| <b>Food Group</b>               | <b>Food Items</b>                                                                                                                                                                                                                                                                                                              |
|---------------------------------|--------------------------------------------------------------------------------------------------------------------------------------------------------------------------------------------------------------------------------------------------------------------------------------------------------------------------------|
| Meat                            | Beef, pork, lamb, chicken/turkey, offal, sausages , bacon, salami/dried meats, sandwich slices, other processed meat (e.g. nuggets, burgers, pies, sausage roll)                                                                                                                                                               |
| Fish                            | Tuna, fish fried in batter/crumbs, white fish, oily fish, shellfish                                                                                                                                                                                                                                                            |
| Plant-based meat alternatives   | Tofu, tempeh, textured vegetable protein, Quorn, falafel, soya burgers or sausages, other veggie burgers or sausages, seitan, other meat alternatives                                                                                                                                                                          |
| Eggs                            | Eggs                                                                                                                                                                                                                                                                                                                           |
| Milk                            | Full cream cows' milk, semi-skimmed cows' milk, skimmed/fat free cows' milk, goats' milk, lactose free milk                                                                                                                                                                                                                    |
| Plant-based milk alternatives   | Soya milk, rice milk, oat milk, pea milk, almond milk, coconut milk, hemp milk, other milk alternatives (hazlenut, cashew)                                                                                                                                                                                                     |
| Cheese                          | Dairy cheese                                                                                                                                                                                                                                                                                                                   |
| Plant-based cheese alternatives | Vegan cheese                                                                                                                                                                                                                                                                                                                   |
| Yogurt                          | Dairy low fat yogurt, dairy full fat yogurt                                                                                                                                                                                                                                                                                    |
| Plant-based yogurt alternatives | Vegan yogurt                                                                                                                                                                                                                                                                                                                   |
| Pulses                          | Hummus, chickpeas, baked beans, other beans or lentils                                                                                                                                                                                                                                                                         |
| Nuts/seeds                      | Peanut/other nut butters (with added sugar), peanut/other nut butters (without sugar), tahini, peanuts/other nuts or seeds (unsalted), peanuts/other nuts or seeds (salted)                                                                                                                                                    |
| Grains                          | White bread, wholemeal bread, brown/ granary bread, other bread products, oatcakes, crackers, crispbread, porridge/Ready brek/overnight oats, All-Bran, bran flakes/Weetabix/muesli, sugary cereal, other breakfast cereal, white rice, brown rice, couscous/bulgur wheat, white pasta/noodles, wholemeal pasta/noodles, pizza |
| Vegetables                      | Tomatoes, salad vegetables, carrots, parsnips/turnips/swedes/beetroot/other root vegetables, peas/green beans, broccoli/spring greens/kale/spinach, cabbage/Brussels sprouts/cauliflower/coleslaw, onions/leeks, mushrooms, sweetcorn, avocado, sweet pepper, other vegetables (e.g. courgette, pumpkin)                       |
| Fruit                           | Apples/pears, oranges/satsumas/grapefruit, banana, other fresh fruit (e.g. grapes, berries, kiwi), tinned or stewed fruit, dried fruit                                                                                                                                                                                         |
| Confectionery                   | Biscuits, cakes/pastries, cereal bar, nut and/or dried fruit bar, fruit pie/fruit tart/crumble, rice pudding/custard/crème caramel/mousse, vegan ice cream/choc ices, dairy ice cream/choc ices, chocolate/sweets, added sugar                                                                                                 |
| Protein shakes/bars             | Protein shake, protein bar                                                                                                                                                                                                                                                                                                     |
| Meal replacements               | Huel shake/bar , other meal replacement shake/bar                                                                                                                                                                                                                                                                              |
| Tea/coffee                      | Tea, coffee (all types)                                                                                                                                                                                                                                                                                                        |
| Non-alcoholic drinks            | Hot chocolate/milkshake (incl. non-dairy), milk-based smoothie (incl. non-dairy), pure fruit juice/smoothie, fruit squash/cordial, low calorie soft drinks /diet fizzy soft drinks, fizzy soft drinks                                                                                                                          |
| Alcoholic drinks                | Wine/champagne/sherry, beer/lager/cider, spirits                                                                                                                                                                                                                                                                               |

**Table S2a.** Mean intakes of major food groups in women, standardised to a 2000 kcal daily diet.

|                                               | Omnivorous    | Flexitarian   | Pescatarian   | Vegetarian    | Vegan         | <i>p</i> -Value |
|-----------------------------------------------|---------------|---------------|---------------|---------------|---------------|-----------------|
| N                                             | 1,243 (24.3%) | 1,153 (22.5%) | 493 (9.6%)    | 1,060 (20.7%) | 1,167 (22.8%) |                 |
| Meat (g/2000 kcal)                            | 122.5 ± 99.3  | 43.5 ± 27.7   | 1.2 ± 7.2     | 0.0 ± 0.7     | 0.1 ± 1.5     | <0.001          |
| Fish (g/2000 kcal)                            | 47.5 ± 28.2   | 46.1 ± 30.3   | 51.0 ± 31.1   | 1.0 ± 4.8     | 0.4 ± 3.4     | <0.001          |
| Plant-based meat alternatives (g/2000 kcal)   | 9.8 ± 12.9    | 28.6 ± 27.4   | 47.7 ± 33.7   | 57.7 ± 38.3   | 70.6 ± 42.9   | <0.001          |
| Eggs (g/2000 kcal)                            | 43.3 ± 50.8   | 31.0 ± 36.8   | 34.1 ± 46.6   | 32.5 ± 49.6   | 0.6 ± 5.7     | <0.001          |
| Milk (ml/2000 kcal)                           | 171.1 ± 147.7 | 129.5 ± 132.9 | 109.3 ± 130.9 | 98.3 ± 133.4  | 0.7 ± 11.7    | <0.001          |
| Plant-based milk alternatives (ml/2000 kcal)  | 33.9 ± 83.4   | 80.3 ± 123.8  | 104.5 ± 126.7 | 118.0 ± 143.0 | 220.6 ± 165.9 | <0.001          |
| Cheese (g/2000 kcal)                          | 18.9 ± 18.2   | 15.4 ± 12.4   | 15.4 ± 12.9   | 18.5 ± 16.6   | 0.1 ± 1.4     | <0.001          |
| Plant-based cheese alternatives (g/2000 kcal) | 0.4 ± 2.6     | 0.9 ± 3.1     | 1.5 ± 3.5     | 2.4 ± 4.6     | 8.0 ± 8.9     | <0.001          |
| Yogurt (g/2000 kcal)                          | 46.3 ± 48.3   | 51.2 ± 55.0   | 47.2 ± 57.7   | 41.0 ± 52.0   | 0.4 ± 5.4     | <0.001          |
| Plant-based yogurt alternatives (g/2000 kcal) | 2.3 ± 12.2    | 7.1 ± 21.0    | 8.9 ± 24.8    | 13.6 ± 28.4   | 35.1 ± 44.5   | <0.001          |
| Pulses (g/2000 kcal)                          | 32.5 ± 29.9   | 54.5 ± 38.2   | 65.8 ± 43.2   | 70.0 ± 42.3   | 100.0 ± 57.8  | <0.001          |
| Nuts/seeds (g/2000 kcal)                      | 14.4 ± 17.6   | 19.9 ± 18.9   | 21.3 ± 19.7   | 21.1 ± 18.3   | 30.6 ± 24.5   | <0.001          |
| Grains (g/2000 kcal)                          | 196.4 ± 116.1 | 260.2 ± 100.7 | 276.1 ± 103.3 | 277.1 ± 100.9 | 300.9 ± 110.1 | <0.001          |
| Vegetables (g/2000 kcal)                      | 326.8 ± 192.6 | 382.6 ± 201.8 | 398.6 ± 201.5 | 374.0 ± 184.8 | 443.9 ± 229.4 | <0.001          |
| Fruit (g/2000 kcal)                           | 168.4 ± 132.4 | 232.0 ± 155.0 | 225.6 ± 158.1 | 217.0 ± 151.3 | 244.8 ± 202.4 | <0.001          |
| Confectionery (g/2000 kcal)                   | 52.3 ± 39.7   | 55.5 ± 34.6   | 55.5 ± 37.6   | 64.7 ± 35.6   | 49.2 ± 31.8   | <0.001          |
| Protein shakes/bars (g/2000 kcal)             | 1.4 ± 6.8     | 1.6 ± 7.1     | 1.4 ± 5.4     | 1.9 ± 8.5     | 3.4 ± 12.0    | <0.001          |
| Meal replacements (g/2000 kcal)               | 0.9 ± 8.5     | 1.2 ± 11.4    | 0.5 ± 4.8     | 1.3 ± 10.6    | 2.0 ± 13.4    | 0.064           |
| Tea/coffee (ml/2000 kcal)                     | 594.5 ± 349.9 | 606.0 ± 349.8 | 616.3 ± 345.6 | 596.2 ± 363.5 | 575.7 ± 361.2 | 0.175           |
| Non-alcoholic drinks (ml/2000 kcal)           | 239.4 ± 344.5 | 179.2 ± 255.8 | 193.8 ± 279.5 | 242.1 ± 323.0 | 233.7 ± 322.7 | <0.001          |
| Alcoholic drinks (ml/2000 kcal)               | 84.2 ± 114.3  | 89.3 ± 102.4  | 97.1 ± 113.2  | 93.0 ± 116.2  | 76.9 ± 114.1  | 0.001           |

ANOVA was used to compare the means between the diet groups; 100 participants who preferred not to state their gender were excluded.

**Table S2b.** Mean intakes of major food groups in men, standardised to a 2000 kcal daily diet.

|                                               | Omnivorous    | Flexitarian   | Pescatarian   | Vegetarian    | Vegan         | P-value |
|-----------------------------------------------|---------------|---------------|---------------|---------------|---------------|---------|
| N                                             | 310 (27.5%)   | 176 (15.6%)   | 71 (6.3%)     | 216 (19.2%)   | 353 (31.3%)   |         |
| Meat (g/2000 kcal)                            | 130.1 ± 99.2  | 41.9 ± 25.7   | 2.2 ± 10.4    | 0.4 ± 3.3     | 0.2 ± 2.4     | <0.001  |
| Fish (g/2000 kcal)                            | 47.3 ± 54.5   | 41.2 ± 28.8   | 53.4 ± 39.2   | 0.7 ± 4.1     | 0.4 ± 3.3     | <0.001  |
| Plant-based meat alternatives (g/2000 kcal)   | 8.7 ± 14.7    | 30.5 ± 28.8   | 42.0 ± 28.3   | 59.4 ± 37.4   | 71.4 ± 44.8   | <0.001  |
| Eggs (g/2000 kcal)                            | 49.3 ± 68.8   | 27.8 ± 35.5   | 33.0 ± 38.1   | 32.8 ± 48.9   | 1.1 ± 11.8    | <0.001  |
| Milk (ml/2000 kcal)                           | 189.8 ± 160.8 | 129.1 ± 142.5 | 97.0 ± 120.7  | 114.6 ± 131.4 | 1.5 ± 17.0    | <0.001  |
| Plant-based milk alternatives (ml/2000 kcal)  | 18.7 ± 59.3   | 64.0 ± 112.3  | 96.1 ± 143.0  | 92.4 ± 124.7  | 197.9 ± 141.7 | <0.001  |
| Cheese (g/2000 kcal)                          | 17.6 ± 15.7   | 14.8 ± 12.6   | 14.7 ± 14.2   | 17.5 ± 15.1   | 0.1 ± 1.0     | <0.001  |
| Plant-based cheese alternatives (g/2000 kcal) | 0.2 ± 1.2     | 1.0 ± 3.5     | 1.3 ± 3.9     | 2.3 ± 4.5     | 7.0 ± 8.0     | <0.001  |
| Yogurt (g/2000 kcal)                          | 35.1 ± 42.0   | 44.5 ± 51.2   | 38.9 ± 51.2   | 38.6 ± 43.0   | 0.5 ± 5.8     | <0.001  |
| Plant-based yogurt alternatives (g/2000 kcal) | 1.1 ± 6.7     | 6.5 ± 20.0    | 7.8 ± 19.2    | 7.0 ± 15.4    | 27.1 ± 44.2   | <0.001  |
| Pulses (g/2000 kcal)                          | 27.4 ± 25.4   | 49.0 ± 38.9   | 74.3 ± 67.2   | 63.6 ± 40.0   | 103.9 ± 72.3  | <0.001  |
| Nuts/seeds (g/2000 kcal)                      | 12.0 ± 15.0   | 20.7 ± 20.9   | 23.3 ± 20.3   | 19.7 ± 17.9   | 32.2 ± 26.6   | <0.001  |
| Grains (g/2000 kcal)                          | 200.6 ± 117.6 | 267.5 ± 100.3 | 287.9 ± 136.0 | 297.4 ± 100.3 | 315.2 ± 120.1 | <0.001  |
| Vegetables (g/2000 kcal)                      | 243.8 ± 173.0 | 290.3 ± 131.2 | 333.1 ± 178.4 | 313.5 ± 145.2 | 364.7 ± 190.1 | <0.001  |
| Fruit (g/2000 kcal)                           | 151.6 ± 148.7 | 221.6 ± 138.2 | 223.5 ± 136.3 | 206.3 ± 144.9 | 244.0 ± 174.0 | <0.001  |
| Confectionery (g/2000 kcal)                   | 48.6 ± 38.7   | 51.1 ± 33.6   | 40.9 ± 26.7   | 56.4 ± 33.0   | 46.7 ± 39.0   | 0.007   |
| Protein shakes/bars (g/2000 kcal)             | 2.0 ± 7.7     | 3.6 ± 13.4    | 3.2 ± 10.8    | 1.4 ± 5.1     | 3.8 ± 11.0    | 0.018   |
| Meal replacements (g/2000 kcal)               | 1.5 ± 10.4    | 3.9 ± 30.8    | 1.1 ± 7.7     | 0.9 ± 7.2     | 5.9 ± 31.5    | 0.039   |
| Tea/coffee (ml/2000 kcal)                     | 486.8 ± 357.0 | 546.1 ± 304.3 | 553.7 ± 267.2 | 564.5 ± 306.9 | 447.1 ± 320.8 | <0.001  |
| Non-alcoholic drinks (ml/2000 kcal)           | 234.3 ± 332.4 | 155.8 ± 200.3 | 133.8 ± 165.5 | 227.6 ± 271.9 | 206.6 ± 302.1 | 0.007   |
| Alcoholic drinks (ml/2000 kcal)               | 167.7 ± 227.6 | 161.1 ± 172.8 | 226.6 ± 294.0 | 156.0 ± 195.8 | 115.4 ± 178.5 | <0.001  |

ANOVA was used to compare the means between the diet groups; 100 participants who preferred not to state their gender were excluded.

**Table S3.** Absolute mean intakes of major food groups (combined).

|                                         | Omnivorous    | Flexitarian   | Pescatarian   | Vegetarian    | Vegan         | <i>p</i> -Value |
|-----------------------------------------|---------------|---------------|---------------|---------------|---------------|-----------------|
| N                                       | 1,562 (24.6%) | 1,349 (21.3%) | 568 (9.0%)    | 1,292 (20.4%) | 1,571 (24.8%) |                 |
| Meat (g/day)                            | 137.9 ± 117.9 | 46.9 ± 29.9   | 1.2 ± 7.3     | 0.1 ± 2.0     | 0.1 ± 1.5     | <0.001          |
| Fish (g/day)                            | 52.1 ± 41.0   | 48.5 ± 32.0   | 54.8 ± 36.9   | 0.9 ± 4.6     | 0.4 ± 3.6     | <0.001          |
| Plant-based meat alternatives (g/day)   | 10.9 ± 15.5   | 31.6 ± 31.2   | 50.6 ± 37.5   | 61.7 ± 43.8   | 76.4 ± 50.2   | <0.001          |
| Eggs (g/day)                            | 47.9 ± 55.5   | 32.6 ± 38.9   | 38.1 ± 53.9   | 34.2 ± 50.6   | 0.8 ± 8.6     | <0.001          |
| Milk (ml/day)                           | 196.9 ± 167.2 | 142.9 ± 148.4 | 117.8 ± 144.1 | 103.5 ± 133.8 | 0.9 ± 14.9    | <0.001          |
| Plant-based milk alternatives (ml/day)  | 33.9 ± 87.2   | 82.6 ± 121.3  | 112.1 ± 142.5 | 119.5 ± 144.1 | 226.5 ± 161.7 | <0.001          |
| Cheese (g/day)                          | 20.9 ± 20.7   | 17.0 ± 14.8   | 16.9 ± 15.8   | 19.6 ± 18.9   | 0.1 ± 1.4     | <0.001          |
| Plant-based cheese alternatives (g/day) | 0.4 ± 3.2     | 1.0 ± 3.1     | 1.6 ± 4.2     | 2.5 ± 4.9     | 8.4 ± 9.6     | <0.001          |
| Yogurt (g/day)                          | 49.5 ± 53.9   | 55.3 ± 61.9   | 49.0 ± 57.6   | 42.7 ± 52.0   | 0.4 ± 5.4     | <0.001          |
| Plant-based yogurt alternatives (g/day) | 2.4 ± 14.3    | 7.6 ± 23.5    | 9.2 ± 24.4    | 13.8 ± 32.6   | 35.7 ± 48.0   | <0.001          |
| Pulses (g/day)                          | 35.4 ± 31.3   | 58.6 ± 42.5   | 72.8 ± 57.8   | 72.6 ± 44.6   | 110.0 ± 78.3  | <0.001          |
| Nuts/seeds (g/day)                      | 16.1 ± 21.2   | 22.9 ± 24.5   | 24.1 ± 24.3   | 23.5 ± 24.3   | 35.6 ± 33.6   | <0.001          |
| Grains (g/day)                          | 228.9 ± 149.1 | 288.8 ± 129.1 | 302.8 ± 135.0 | 299.7 ± 128.4 | 331.4 ± 149.6 | <0.001          |
| Vegetables (g/day)                      | 341.0 ± 207.3 | 395.4 ± 210.5 | 415.2 ± 213.8 | 381.6 ± 204.2 | 453.7 ± 243.7 | <0.001          |
| Fruit (g/day)                           | 185.6 ± 154.1 | 249.5 ± 170.2 | 240.4 ± 164.8 | 223.5 ± 154.8 | 261.0 ± 203.7 | <0.001          |
| Confectionery (g/day)                   | 60.2 ± 51.7   | 63.3 ± 49.0   | 59.6 ± 45.1   | 68.9 ± 46.2   | 53.7 ± 41.3   | <0.001          |
| Protein shakes/bars (g/day)             | 1.8 ± 8.3     | 2.2 ± 9.8     | 2.0 ± 8.6     | 1.9 ± 8.1     | 3.8 ± 12.8    | <0.001          |
| Meal replacements (g/day)               | 1.4 ± 11.3    | 1.9 ± 20.7    | 0.7 ± 6.0     | 1.5 ± 12.0    | 3.2 ± 20.9    | 0.005           |
| Tea/coffee (ml/day)                     | 618.4 ± 335.3 | 629.1 ± 318.0 | 628.9 ± 302.9 | 598.8 ± 320.3 | 566.4 ± 333.0 | <0.001          |
| Non-alcoholic drinks (ml/day)           | 268.4 ± 379.1 | 194.7 ± 266.7 | 199.8 ± 287.1 | 252.1 ± 322.8 | 234.3 ± 313.5 | <0.001          |
| Alcoholic drinks (ml/day)               | 115.7 ± 181.2 | 110.0 ± 140.6 | 127.4 ± 195.7 | 111.5 ± 155.6 | 93.9 ± 153.1  | <0.001          |

ANOVA was used to compare the means between the diet groups.

**Table S4a.** Mean daily dietary nutrient intakes for women (unadjusted).

|                                      | Omnivorous      | Flexitarian     | Pescatarian     | Vegetarian      | Vegan           |
|--------------------------------------|-----------------|-----------------|-----------------|-----------------|-----------------|
| N                                    | 1,243 (24.3%)   | 1,153 (22.5%)   | 493 (9.6%)      | 1,060 (20.7%)   | 1,167 (22.8%)   |
| Energy (kJ)                          | 9305.1 ± 2256.3 | 9212.5 ± 2276.5 | 9013.4 ± 2296.3 | 8820.8 ± 2266.7 | 8871.1 ± 2382.2 |
| Energy:BMR ratio                     | 1.6 ± 0.4       | 1.7 ± 0.4       | 1.6 ± 0.4       | 1.6 ± 0.4       | 1.6 ± 0.5       |
| Energy:BMR ratio <1.2 (%)            | 15.1            | 14.6            | 17.2            | 19.0            | 19.5            |
| Carbohydrate (%E)                    | 37.7 ± 13.8     | 44.6 ± 7.0      | 46.2 ± 7.2      | 48.6 ± 6.8      | 49.1 ± 6.8      |
| Total sugars (%E)                    | 17.5 ± 6.6      | 20.0 ± 5.2      | 20.3 ± 5.3      | 20.8 ± 5.1      | 20.2 ± 5.8      |
| Free sugars (%E)                     | 7.6 ± 4.5       | 7.8 ± 3.5       | 8.0 ± 3.8       | 8.9 ± 3.8       | 7.6 ± 3.8       |
| Starch (%E)                          | 20.3 ± 9.3      | 24.8 ± 6.1      | 26.1 ± 6.0      | 28.0 ± 5.9      | 30.7 ± 6.9      |
| Protein (%E)                         | 17.8 ± 4.4      | 15.1 ± 2.4      | 14.1 ± 2.3      | 12.5 ± 2.1      | 12.1 ± 2.4      |
| Protein (g) per kg body weight       | 1.5 ± 0.6       | 1.4 ± 0.4       | 1.2 ± 0.4       | 1.1 ± 0.4       | 1.1 ± 0.4       |
| Fat (%E)                             | 40.8 ± 11.4     | 36.5 ± 6.5      | 35.7 ± 7.0      | 35.2 ± 6.3      | 35.4 ± 6.6      |
| SFA (%E)                             | 14.2 ± 5.5      | 11.0 ± 2.3      | 10.1 ± 2.3      | 10.3 ± 2.4      | 7.9 ± 1.7       |
| MUFA (%E)                            | 16.2 ± 5.0      | 15.0 ± 3.7      | 14.8 ± 4.0      | 14.2 ± 3.5      | 15.0 ± 3.8      |
| PUFA (%E)                            | 6.6 ± 1.7       | 7.1 ± 1.7       | 7.5 ± 1.9       | 7.4 ± 1.8       | 9.2 ± 2.0       |
| PS ratio                             | 0.5 ± 0.2       | 0.7 ± 0.2       | 0.8 ± 0.2       | 0.8 ± 0.2       | 1.2 ± 0.3       |
| Cholesterol (mg)                     | 403.0 ± 277.5   | 247.1 ± 159.3   | 211.8 ± 203.5   | 164.3 ± 177.5   | 18.8 ± 24.1     |
| N-3 fatty acids (g)                  | 2.8 ± 1.1       | 2.8 ± 0.9       | 2.8 ± 1.1       | 2.3 ± 0.9       | 2.8 ± 1.0       |
| N-6 fatty acids (g)                  | 13.7 ± 5.2      | 14.9 ± 5.5      | 15.5 ± 6.1      | 15.5 ± 6.2      | 19.6 ± 7.6      |
| Trans fatty acids (g)                | 1.4 ± 0.9       | 0.9 ± 0.4       | 0.8 ± 0.4       | 0.8 ± 0.4       | 0.4 ± 0.2       |
| Alcohol (%E)                         | 2.6 ± 3.5       | 2.7 ± 3.3       | 3.0 ± 3.5       | 2.6 ± 3.2       | 2.1 ± 3.0       |
| Alcohol (g)                          | 8.5 ± 11.8      | 8.6 ± 10.8      | 9.1 ± 11.6      | 8.0 ± 10.0      | 6.4 ± 9.5       |
| AOAC Fibre (g)                       | 28.4 ± 12.1     | 36.4 ± 11.0     | 38.4 ± 11.8     | 38.1 ± 11.3     | 45.3 ± 14.6     |
| β-Carotene (µg)                      | 3788.5 ± 2353.6 | 4367.9 ± 2586.7 | 4228.4 ± 2290.7 | 4094.3 ± 2393.0 | 4824.5 ± 2850.9 |
| Retinol (µg)                         | 926.3 ± 1621.1  | 443.5 ± 375.1   | 259.5 ± 156.1   | 256.2 ± 175.7   | 88.3 ± 162.3    |
| Vitamin A (retinol equivalents) (µg) | 1637.3 ± 1629.6 | 1265.0 ± 633.7  | 1051.5 ± 462.0  | 1018.2 ± 485.7  | 978.8 ± 548.1   |
| Vitamin D (µg)                       | 5.5 ± 2.8       | 4.8 ± 2.4       | 4.7 ± 2.8       | 3.0 ± 1.9       | 2.5 ± 1.6       |
| Thiamin (mg)                         | 2.0 ± 0.6       | 2.2 ± 0.6       | 2.2 ± 0.6       | 2.2 ± 0.7       | 2.5 ± 0.8       |
| Riboflavin (mg)                      | 2.2 ± 0.7       | 2.0 ± 0.7       | 1.9 ± 0.7       | 1.9 ± 0.6       | 1.8 ± 0.7       |
| Niacin equivalent (mg)               | 45.9 ± 13.7     | 39.5 ± 10.1     | 35.6 ± 9.8      | 30.8 ± 8.7      | 32.0 ± 9.9      |
| Vitamin C (mg)                       | 154.8 ± 79.1    | 172.8 ± 77.4    | 174.6 ± 75.9    | 167.1 ± 78.0    | 190.6 ± 99.5    |
| Vitamin E (mg)                       | 14.1 ± 5.3      | 15.5 ± 4.9      | 16.5 ± 5.6      | 15.8 ± 5.6      | 18.5 ± 6.3      |
| Vitamin B6 (mg)                      | 2.3 ± 0.6       | 2.1 ± 0.6       | 2.0 ± 0.6       | 1.8 ± 0.6       | 2.0 ± 0.7       |
| Vitamin B12 (µg)                     | 9.4 ± 6.7       | 6.4 ± 2.8       | 5.4 ± 2.6       | 3.3 ± 1.7       | 2.0 ± 1.3       |
| Folate (µg)                          | 359.5 ± 123.4   | 398.4 ± 121.4   | 403.4 ± 123.1   | 402.9 ± 129.0   | 437.5 ± 158.1   |
| Pantothenic acid (mg)                | 8.1 ± 2.3       | 7.4 ± 2.1       | 6.8 ± 2.1       | 6.3 ± 2.0       | 5.6 ± 1.8       |
| Biotin (µg)                          | 55.1 ± 18.7     | 57.9 ± 19.3     | 59.4 ± 21.2     | 57.5 ± 20.5     | 65.0 ± 25.6     |
| Sodium (mg)                          | 1904.0 ± 567.6  | 1775.0 ± 535.7  | 1705.7 ± 538.9  | 1697.3 ± 545.1  | 1664.6 ± 583.4  |
| Potassium (mg)                       | 3895.2 ± 1059.5 | 4046.9 ± 1049.6 | 4009.2 ± 1051.5 | 3771.5 ± 1021.3 | 4026.9 ± 1243.3 |
| Calcium (mg)                         | 957.7 ± 322.8   | 1019.1 ± 322.1  | 1028.6 ± 332.8  | 1036.2 ± 309.8  | 1003.9 ± 346.4  |
| Magnesium (mg)                       | 358.4 ± 109.7   | 407.9 ± 109.0   | 418.4 ± 114.1   | 402.9 ± 115.0   | 461.7 ± 145.7   |
| Phosphorus (mg)                      | 1587.2 ± 399.9  | 1535.5 ± 390.9  | 1496.1 ± 399.4  | 1384.8 ± 373.7  | 1353.2 ± 399.5  |
| Iron (mg)                            | 13.6 ± 4.0      | 14.7 ± 4.0      | 14.9 ± 4.3      | 14.8 ± 4.3      | 17.0 ± 5.2      |
| Haem iron (mg)                       | 1.0 ± 0.9       | 0.5 ± 0.2       | 0.3 ± 0.2       | 0.1 ± 0.1       | 0.2 ± 0.2       |
| Non-haem iron (mg)                   | 12.5 ± 3.9      | 14.2 ± 3.9      | 14.6 ± 4.2      | 14.6 ± 4.2      | 16.7 ± 5.1      |
| Copper (mg)                          | 1.8 ± 0.9       | 1.8 ± 0.5       | 1.8 ± 0.6       | 1.8 ± 0.6       | 2.1 ± 0.7       |
| Zinc (mg)                            | 12.1 ± 4.3      | 10.6 ± 2.7      | 10.0 ± 2.8      | 9.8 ± 2.9       | 9.7 ± 3.0       |
| Chloride (mg)                        | 3365.4 ± 955.6  | 3202.1 ± 910.4  | 3070.3 ± 903.9  | 3060.4 ± 899.3  | 3276.3 ± 1132.2 |
| Iodine (µg)                          | 226.6 ± 75.8    | 201.8 ± 77.1    | 195.7 ± 79.3    | 132.4 ± 55.4    | 85.6 ± 35.6     |
| Manganese (mg)                       | 4.2 ± 1.9       | 5.5 ± 1.7       | 6.0 ± 1.8       | 6.0 ± 1.8       | 7.1 ± 2.2       |
| Selenium (µg)                        | 78.0 ± 27.2     | 67.0 ± 22.2     | 64.5 ± 24.3     | 41.9 ± 16.4     | 39.7 ± 14.0     |

Data are presented as mean ± SD.

**Table S4b.** Mean daily dietary nutrient intakes for men (unadjusted).

|                                      | Omnivorous       | Flexitarian      | Pescatarian      | Vegetarian       | Vegan            |
|--------------------------------------|------------------|------------------|------------------|------------------|------------------|
| N                                    | 310 (27.5%)      | 176 (15.6%)      | 71 (6.3%)        | 216 (19.2%)      | 353 (31.3%)      |
| Energy (kJ)                          | 10366.1 ± 2791.2 | 10108.9 ± 2515.2 | 10622.0 ± 2776.7 | 10022.3 ± 2607.7 | 10183.1 ± 2697.7 |
| Energy:BMR ratio                     | 1.4 ± 0.4        | 1.5 ± 0.4        | 1.6 ± 0.4        | 1.5 ± 0.4        | 1.5 ± 0.4        |
| Energy:BMR ratio <1.2 (%)            | 29.0             | 25.0             | 14.1             | 25.0             | 28.3             |
| Carbohydrate (%E)                    | 38.0 ± 14.5      | 45.2 ± 6.5       | 46.7 ± 7.3       | 50.1 ± 6.5       | 50.0 ± 7.1       |
| Total sugars (%E)                    | 16.9 ± 6.8       | 19.6 ± 5.2       | 19.9 ± 4.9       | 20.6 ± 6.0       | 19.7 ± 5.4       |
| Free sugars (%E)                     | 7.9 ± 4.4        | 8.0 ± 3.4        | 7.7 ± 3.0        | 9.1 ± 4.1        | 7.3 ± 3.9        |
| Starch (%E)                          | 21.1 ± 10.1      | 25.7 ± 5.9       | 26.9 ± 7.2       | 29.7 ± 5.7       | 31.8 ± 7.4       |
| Protein (%E)                         | 17.9 ± 5.2       | 14.9 ± 2.8       | 14.2 ± 2.5       | 12.7 ± 2.0       | 12.5 ± 2.3       |
| Protein (g) per kg body weight       | 1.4 ± 0.6        | 1.2 ± 0.4        | 1.2 ± 0.4        | 1.0 ± 0.3        | 1.1 ± 0.4        |
| Fat (%E)                             | 39.0 ± 11.2      | 35.2 ± 6.1       | 33.4 ± 7.1       | 33.0 ± 5.9       | 33.8 ± 6.9       |
| SFA (%E)                             | 13.9 ± 5.5       | 10.5 ± 2.3       | 9.2 ± 2.3        | 9.5 ± 2.1        | 7.5 ± 1.8        |
| MUFA (%E)                            | 15.3 ± 4.6       | 14.5 ± 3.3       | 13.9 ± 3.8       | 13.5 ± 3.4       | 14.2 ± 3.9       |
| PUFA (%E)                            | 6.1 ± 1.5        | 6.9 ± 1.8        | 7.1 ± 1.9        | 7.1 ± 1.8        | 9.1 ± 2.2        |
| PS ratio                             | 0.5 ± 0.2        | 0.7 ± 0.3        | 0.8 ± 0.3        | 0.8 ± 0.3        | 1.3 ± 0.3        |
| Cholesterol (mg)                     | 468.8 ± 351.5    | 250.5 ± 161.0    | 232.8 ± 173.2    | 190.9 ± 228.2    | 21.8 ± 62.1      |
| N-3 fatty acids (g)                  | 2.9 ± 1.4        | 3.0 ± 1.3        | 3.2 ± 1.3        | 2.5 ± 1.1        | 3.0 ± 1.1        |
| N-6 fatty acids (g)                  | 14.1 ± 5.5       | 16.2 ± 6.7       | 16.9 ± 5.4       | 17.1 ± 7.3       | 22.3 ± 9.0       |
| Trans fatty acids (g)                | 1.6 ± 0.9        | 1.0 ± 0.4        | 0.8 ± 0.5        | 0.8 ± 0.4        | 0.4 ± 0.3        |
| Alcohol (%E)                         | 4.0 ± 5.2        | 3.7 ± 3.6        | 4.7 ± 5.4        | 3.2 ± 3.9        | 2.4 ± 3.6        |
| Alcohol (g)                          | 14.0 ± 19.6      | 12.8 ± 12.8      | 18.1 ± 23.3      | 11.3 ± 15.1      | 8.5 ± 13.4       |
| AOAC Fibre (g)                       | 28.8 ± 13.6      | 38.2 ± 11.7      | 44.9 ± 14.1      | 42.1 ± 12.6      | 51.5 ± 16.7      |
| β-Carotene (µg)                      | 3237.0 ± 1979.9  | 3687.4 ± 1859.0  | 4437.9 ± 2263.9  | 3936.5 ± 2186.1  | 4655.0 ± 2626.6  |
| Retinol (µg)                         | 1286.6 ± 2579.6  | 551.6 ± 415.5    | 306.1 ± 203.8    | 276.9 ± 182.6    | 154.2 ± 451.8    |
| Vitamin A (retinol equivalents) (µg) | 1880.7 ± 2562.9  | 1238.3 ± 545.0   | 1143.7 ± 509.8   | 1010.8 ± 437.1   | 954.6 ± 507.1    |
| Vitamin D (µg)                       | 6.0 ± 4.1        | 5.0 ± 3.6        | 5.6 ± 3.6        | 3.3 ± 2.5        | 2.8 ± 2.1        |
| Thiamin (mg)                         | 2.2 ± 0.7        | 2.3 ± 0.7        | 2.5 ± 0.7        | 2.6 ± 0.9        | 2.9 ± 0.9        |
| Riboflavin (mg)                      | 2.5 ± 1.0        | 2.1 ± 0.7        | 2.2 ± 0.7        | 2.2 ± 0.7        | 1.9 ± 0.7        |
| Niacin equivalent (mg)               | 51.7 ± 18.2      | 43.4 ± 11.7      | 43.9 ± 12.3      | 36.9 ± 10.1      | 38.1 ± 11.7      |
| Vitamin C (mg)                       | 139.3 ± 78.5     | 160.2 ± 70.9     | 186.8 ± 83.9     | 172.9 ± 85.3     | 192.5 ± 92.3     |
| Vitamin E (mg)                       | 14.0 ± 5.4       | 16.2 ± 5.7       | 17.9 ± 5.1       | 17.0 ± 6.5       | 19.4 ± 6.7       |
| Vitamin B6 (mg)                      | 2.5 ± 0.8        | 2.3 ± 0.6        | 2.4 ± 0.8        | 2.2 ± 0.7        | 2.3 ± 0.7        |
| Vitamin B12 (µg)                     | 11.6 ± 11.5      | 6.9 ± 3.5        | 6.4 ± 3.5        | 3.9 ± 1.9        | 2.2 ± 1.6        |
| Folate (µg)                          | 375.5 ± 131.2    | 417.9 ± 125.5    | 473.8 ± 136.2    | 456.4 ± 135.2    | 495.6 ± 167.7    |
| Pantothenic acid (mg)                | 8.9 ± 2.8        | 7.7 ± 2.3        | 7.6 ± 2.6        | 7.2 ± 2.1        | 6.3 ± 2.0        |
| Biotin (µg)                          | 61.0 ± 21.0      | 65.9 ± 24.6      | 71.5 ± 21.0      | 67.1 ± 22.6      | 76.5 ± 30.5      |
| Sodium (mg)                          | 2256.1 ± 863.4   | 1973.8 ± 632.2   | 2066.9 ± 688.7   | 2032.2 ± 666.6   | 1924.4 ± 705.5   |
| Potassium (mg)                       | 4110.9 ± 1196.8  | 4224.9 ± 1010.5  | 4647.1 ± 1386.3  | 4241.9 ± 1146.2  | 4443.0 ± 1347.4  |
| Calcium (mg)                         | 1041.2 ± 400.3   | 1069.2 ± 356.5   | 1171.7 ± 394.9   | 1134.5 ± 336.3   | 1102.7 ± 380.9   |
| Magnesium (mg)                       | 384.3 ± 122.6    | 444.8 ± 125.5    | 496.3 ± 126.3    | 458.1 ± 129.9    | 534.1 ± 167.8    |
| Phosphorus (mg)                      | 1755.9 ± 515.5   | 1646.2 ± 435.3   | 1743.5 ± 505.2   | 1576.7 ± 409.7   | 1563.6 ± 460.3   |
| Iron (mg)                            | 15.1 ± 4.8       | 16.4 ± 4.6       | 18.1 ± 5.5       | 17.0 ± 5.1       | 20.1 ± 6.0       |
| Haem iron (mg)                       | 1.2 ± 1.3        | 0.5 ± 0.2        | 0.3 ± 0.2        | 0.2 ± 0.2        | 0.2 ± 0.2        |
| Non-haem iron (mg)                   | 13.8 ± 4.5       | 15.9 ± 4.6       | 17.8 ± 5.4       | 16.8 ± 5.0       | 19.8 ± 6.0       |
| Copper (mg)                          | 2.0 ± 1.4        | 2.0 ± 0.6        | 2.1 ± 0.6        | 2.0 ± 0.6        | 2.5 ± 0.8        |
| Zinc (mg)                            | 13.6 ± 5.6       | 11.5 ± 3.1       | 11.7 ± 3.4       | 11.2 ± 3.1       | 11.3 ± 3.5       |
| Chloride (mg)                        | 3922.4 ± 1370.3  | 3544.1 ± 1057.6  | 3716.8 ± 1230.1  | 3648.2 ± 1122.6  | 3721.2 ± 1304.2  |
| Iodine (µg)                          | 260.7 ± 122.8    | 208.8 ± 81.0     | 231.7 ± 109.2    | 152.1 ± 58.5     | 95.5 ± 41.1      |
| Manganese (mg)                       | 4.4 ± 2.2        | 6.1 ± 2.0        | 7.1 ± 2.0        | 6.9 ± 2.2        | 8.3 ± 2.6        |
| Selenium (µg)                        | 86.5 ± 43.4      | 69.7 ± 23.8      | 75.6 ± 30.4      | 48.9 ± 20.0      | 47.0 ± 17.2      |

Data are presented as mean ± SD.

**Table S5a.** Supplement use in women, by diet group.

|                                                  | Omnivorous    | Flexitarian   | Pescatarian | Vegetarian    | Vegan         | <i>p</i> -Value |
|--------------------------------------------------|---------------|---------------|-------------|---------------|---------------|-----------------|
| N                                                | 1,243 (24.3%) | 1,153 (22.5%) | 493 (9.6%)  | 1,060 (20.7%) | 1,167 (22.8%) |                 |
| Take any vitamins, minerals, and/or supplements? |               |               |             |               |               |                 |
| Yes                                              | 843 (67.8%)   | 803 (69.6%)   | 355 (72.0%) | 813 (76.7%)   | 1,027 (88.0%) | <0.001          |
| No                                               | 392 (31.5%)   | 347 (30.1%)   | 137 (27.8%) | 244 (23.0%)   | 138 (11.8%)   |                 |
| prefer not to say                                | 8 (0.6%)      | 3 (0.3%)      | 1 (0.2%)    | 3 (0.3%)      | 2 (0.2%)      |                 |
| Multivitamins with minerals                      | 260 (20.9%)   | 256 (22.2%)   | 154 (31.2%) | 369 (34.8%)   | 552 (47.3%)   | <0.001          |
| Multivitamins without minerals                   | 31 (2.5%)     | 29 (2.5%)     | 13 (2.6%)   | 45 (4.2%)     | 48 (4.1%)     | 0.027           |
| Long-chain omega-3 fatty acids                   | 194 (15.6%)   | 140 (12.1%)   | 65 (13.2%)  | 152 (14.3%)   | 279 (23.9%)   | <0.001          |
| Iron                                             | 100 (8.0%)    | 117 (10.1%)   | 73 (14.8%)  | 169 (15.9%)   | 200 (17.1%)   | <0.001          |
| Zinc                                             | 114 (9.2%)    | 76 (6.6%)     | 55 (11.2%)  | 77 (7.3%)     | 127 (10.9%)   | <0.001          |
| Calcium                                          | 115 (9.3%)    | 112 (9.7%)    | 58 (11.8%)  | 123 (11.6%)   | 141 (12.1%)   | 0.103           |
| Iodine                                           | 32 (2.6%)     | 5 (0.4%)      | 8 (1.6%)    | 19 (1.8%)     | 99 (8.5%)     | <0.001          |
| Selenium                                         | 27 (2.2%)     | 12 (1.0%)     | 12 (2.4%)   | 30 (2.8%)     | 52 (4.5%)     | <0.001          |
| Vitamin A                                        | 14 (1.1%)     | 12 (1.0%)     | 13 (2.6%)   | 17 (1.6%)     | 18 (1.5%)     | 0.117           |
| Folate                                           | 52 (4.2%)     | 38 (3.3%)     | 10 (2.0%)   | 29 (2.7%)     | 45 (3.9%)     | 0.119           |
| Vit B12 tablets                                  | 97 (7.8%)     | 112 (9.7%)    | 78 (15.8%)  | 199 (18.8%)   | 441 (37.8%)   | <0.001          |
| Vit B12 spray                                    | 19 (1.5%)     | 14 (1.2%)     | 9 (1.8%)    | 20 (1.9%)     | 53 (4.5%)     | <0.001          |
| Vit B12 injections                               | 17 (1.4%)     | 10 (0.9%)     | 5 (1.0%)    | 26 (2.5%)     | 22 (1.9%)     | 0.025           |
| Vitamin C                                        | 136 (10.9%)   | 119 (10.3%)   | 60 (12.2%)  | 107 (10.1%)   | 111 (9.5%)    | 0.534           |
| Vitamin D                                        | 502 (40.4%)   | 497 (43.1%)   | 204 (41.4%) | 422 (39.8%)   | 456 (39.1%)   | 0.339           |
| Vitamin E                                        | 21 (1.7%)     | 18 (1.6%)     | 17 (3.4%)   | 19 (1.8%)     | 23 (2.0%)     | 0.117           |
| Superfoods                                       | 30 (2.4%)     | 49 (4.2%)     | 23 (4.7%)   | 36 (3.4%)     | 110 (9.4%)    | <0.001          |
| Other supplements                                | 283 (22.8%)   | 203 (17.6%)   | 80 (16.2%)  | 187 (17.6%)   | 204 (17.5%)   | 0.001           |

**Table S5b.** Supplement use in men, by diet group.

|                                                  | Omnivorous  | Flexitarian | Pescatarian | Vegetarian  | Vegan       | <i>p</i> -Value |
|--------------------------------------------------|-------------|-------------|-------------|-------------|-------------|-----------------|
| N                                                | 310 (27.5%) | 176 (15.6%) | 71 (6.3%)   | 216 (19.2%) | 353 (31.3%) |                 |
| Take any vitamins, minerals, and/or supplements? |             |             |             |             |             |                 |
| Yes                                              | 169 (54.5%) | 103 (58.5%) | 51 (71.8%)  | 149 (69.0%) | 302 (85.6%) | <0.001          |
| No                                               | 139 (44.8%) | 73 (41.5%)  | 20 (28.2%)  | 65 (30.1%)  | 50 (14.2%)  |                 |
| prefer not to say                                | 2 (0.6%)    | 0 (0.0%)    | 0 (0.0%)    | 2 (0.9%)    | 1 (0.3%)    |                 |
| Multivitamins with minerals                      | 70 (22.6%)  | 40 (22.7%)  | 18 (25.4%)  | 72 (33.3%)  | 188 (53.3%) | <0.001          |
| Multivitamins without minerals                   | 4 (1.3%)    | 4 (2.3%)    | 2 (2.8%)    | 7 (3.2%)    | 15 (4.2%)   | 0.234           |
| Long-chain omega-3 fatty acids                   | 37 (11.9%)  | 31 (17.6%)  | 10 (14.1%)  | 27 (12.5%)  | 92 (26.1%)  | <0.001          |
| Iron                                             | 9 (2.9%)    | 9 (5.1%)    | 4 (5.6%)    | 29 (13.4%)  | 31 (8.8%)   | <0.001          |
| Zinc                                             | 19 (6.1%)   | 24 (13.6%)  | 4 (5.6%)    | 14 (6.5%)   | 34 (9.6%)   | 0.030           |
| Calcium                                          | 9 (2.9%)    | 7 (4.0%)    | 4 (5.6%)    | 8 (3.7%)    | 34 (9.6%)   | 0.001           |
| Iodine                                           | 7 (2.3%)    | 3 (1.7%)    | 1 (1.4%)    | 2 (0.9%)    | 42 (11.9%)  | <0.001          |
| Selenium                                         | 5 (1.6%)    | 5 (2.8%)    | 1 (1.4%)    | 4 (1.9%)    | 22 (6.2%)   | 0.005           |
| Vitamin A                                        | 4 (1.3%)    | 2 (1.1%)    | 0 (0.0%)    | 3 (1.4%)    | 3 (0.8%)    | 0.863           |
| Folate                                           | 3 (1.0%)    | 0 (0.0%)    | 2 (2.8%)    | 4 (1.9%)    | 8 (2.3%)    | 0.226           |
| Vit B12 tablets                                  | 18 (5.8%)   | 19 (10.8%)  | 15 (21.1%)  | 46 (21.3%)  | 124 (35.1%) | <0.001          |
| Vit B12 spray                                    | 1 (0.3%)    | 3 (1.7%)    | 1 (1.4%)    | 3 (1.4%)    | 14 (4.0%)   | 0.015           |
| Vit B12 injections                               | 0 (0.0%)    | 0 (0.0%)    | 1 (1.4%)    | 5 (2.3%)    | 3 (0.8%)    | 0.033           |
| Vitamin C                                        | 23 (7.4%)   | 23 (13.1%)  | 5 (7.0%)    | 28 (13.0%)  | 22 (6.2%)   | 0.015           |
| Vitamin D                                        | 85 (27.4%)  | 49 (27.8%)  | 24 (33.8%)  | 67 (31.0%)  | 122 (34.6%) | 0.284           |
| Vitamin E                                        | 6 (1.9%)    | 6 (3.4%)    | 2 (2.8%)    | 4 (1.9%)    | 5 (1.4%)    | 0.626           |
| Superfoods                                       | 6 (1.9%)    | 13 (7.4%)   | 2 (2.8%)    | 4 (1.9%)    | 20 (5.7%)   | 0.007           |
| Other supplements                                | 47 (15.2%)  | 21 (11.9%)  | 10 (14.1%)  | 26 (12.0%)  | 45 (12.7%)  | 0.800           |

**Table S6.** Mean daily dietary nutrient intakes: results from sensitivity analysis (includes vitamins, minerals, and supplements).

|                                      | Omnivores | Flexitarians | Pescatarians | Vegetarians | Vegans |
|--------------------------------------|-----------|--------------|--------------|-------------|--------|
| Energy (kJ)                          | 9511      | 9388         | 9277         | 9047        | 9132   |
| Energy:BMR ratio                     | 1.59      | 1.63         | 1.60         | 1.55        | 1.59   |
| Energy:BMR ratio <1.2                | 0.18      | 0.17         | 0.18         | 0.21        | 0.20   |
| Carbohydrate (%E)                    | 37.8      | 44.8         | 46.4         | 48.9        | 49.2   |
| Total sugars (%E)                    | 17.4      | 19.9         | 20.1         | 20.6        | 20.2   |
| Free sugars (%E)                     | 7.67      | 7.85         | 8.02         | 8.99        | 7.40   |
| Starch (%E)                          | 20.5      | 25.0         | 26.4         | 28.4        | 30.8   |
| Protein (%E)                         | 17.8      | 15.1         | 14.2         | 12.6        | 12.2   |
| Protein (g) per kg body weight       | 1.49      | 1.34         | 1.24         | 1.06        | 1.06   |
| Fat (%E)                             | 40.4      | 36.2         | 35.3         | 34.8        | 35.1   |
| SFA (%E)                             | 14.2      | 10.9         | 9.9          | 10.2        | 7.9    |
| MUFA (%E)                            | 16.0      | 14.9         | 14.7         | 14.1        | 14.9   |
| PUFA (%E)                            | 6.47      | 7.05         | 7.38         | 7.37        | 9.23   |
| PS ratio                             | 0.50      | 0.68         | 0.78         | 0.76        | 1.21   |
| Cholesterol (mg)                     | 415       | 248          | 217          | 168         | 20     |
| N-3 fatty acids (g)                  | 2.83      | 2.80         | 2.86         | 2.35        | 2.83   |
| N-6 fatty acids (g)                  | 13.8      | 15.1         | 15.7         | 15.9        | 20.2   |
| Trans fatty acids (g)                | 1.45      | 0.95         | 0.77         | 0.80        | 0.38   |
| Alcohol (%E)                         | 2.85      | 2.85         | 3.16         | 2.72        | 2.23   |
| Alcohol (g)                          | 9.38      | 9.24         | 10.26        | 8.45        | 6.98   |
| AOAC Fibre (g)                       | 28.4      | 36.7         | 39.3         | 38.8        | 46.7   |
| β-Carotene (μg)                      | 3668      | 4240         | 4204         | 4039        | 4859   |
| Retinol (μg)                         | 997       | 466          | 272          | 259         | 102    |
| Vitamin A (retinol equivalents) (μg) | 1682      | 1261         | 1057         | 1009        | 989    |
| Vitamin D (μg)                       | 5.57      | 4.82         | 4.82         | 3.07        | 2.60   |
| Thiamin (mg)                         | 2.07      | 2.19         | 2.23         | 2.28        | 2.62   |
| Riboflavin (mg)                      | 2.26      | 2.03         | 1.96         | 1.94        | 1.80   |
| Niacin equivalent (mg)               | 47.0      | 40.2         | 36.9         | 31.9        | 33.3   |
| Vitamin C (mg)                       | 151       | 170          | 175          | 167         | 193    |
| Vitamin E (mg)                       | 14.1      | 15.7         | 16.7         | 16.0        | 18.7   |
| Vitamin B6 (mg)                      | 2.30      | 2.15         | 2.05         | 1.90        | 2.04   |
| Vitamin B12 (μg)                     | 9.89      | 6.60         | 5.68         | 3.51        | 2.41   |
| Folate (μg)                          | 362       | 401          | 413          | 411         | 453    |
| Pantothenic acid (mg)                | 8.25      | 7.42         | 6.90         | 6.42        | 5.84   |
| Biotin (μg)                          | 56.2      | 59.4         | 61.4         | 59.2        | 67.5   |
| Sodium (mg)                          | 1973      | 1816         | 1769         | 1761        | 1712   |
| Potassium (mg)                       | 3923      | 4072         | 4085         | 3836        | 4144   |
| Calcium (mg)                         | 976       | 1031         | 1055         | 1055        | 1022   |
| Magnesium (mg)                       | 363       | 414          | 430          | 413         | 478    |
| Phosphorus (mg)                      | 1619      | 1557         | 1537         | 1420        | 1397   |
| Iron (mg)                            | 13.9      | 15.1         | 15.4         | 15.2        | 17.6   |
| Haem iron (mg)                       | 1.05      | 0.49         | 0.30         | 0.16        | 0.18   |
| Non-haem iron (mg)                   | 12.8      | 14.5         | 15.1         | 15.1        | 17.3   |
| Copper (mg)                          | 1.80      | 1.86         | 1.86         | 1.81        | 2.20   |
| Zinc (mg)                            | 12.4      | 10.8         | 10.3         | 10.1        | 10.0   |
| Chloride (mg)                        | 3472      | 3269         | 3177         | 3166        | 3363   |

|                |      |      |      |      |      |
|----------------|------|------|------|------|------|
| Iodine (µg)    | 232  | 203  | 200  | 135  | 89   |
| Manganese (mg) | 4.23 | 5.64 | 6.12 | 6.14 | 7.37 |
| Selenium (µg)  | 79.7 | 67.5 | 66.4 | 43.2 | 41.3 |

---
